# Supplementary figures and images for: COVID-19 in Children: Expressions of Type I/II/III Interferons, TRIM28, SETDB1, and Endogenous Retroviruses in Mild and Severe Cases
Source: MDPI journal article supplement (doi:10.3390/ijms22147481), 2021-07-13

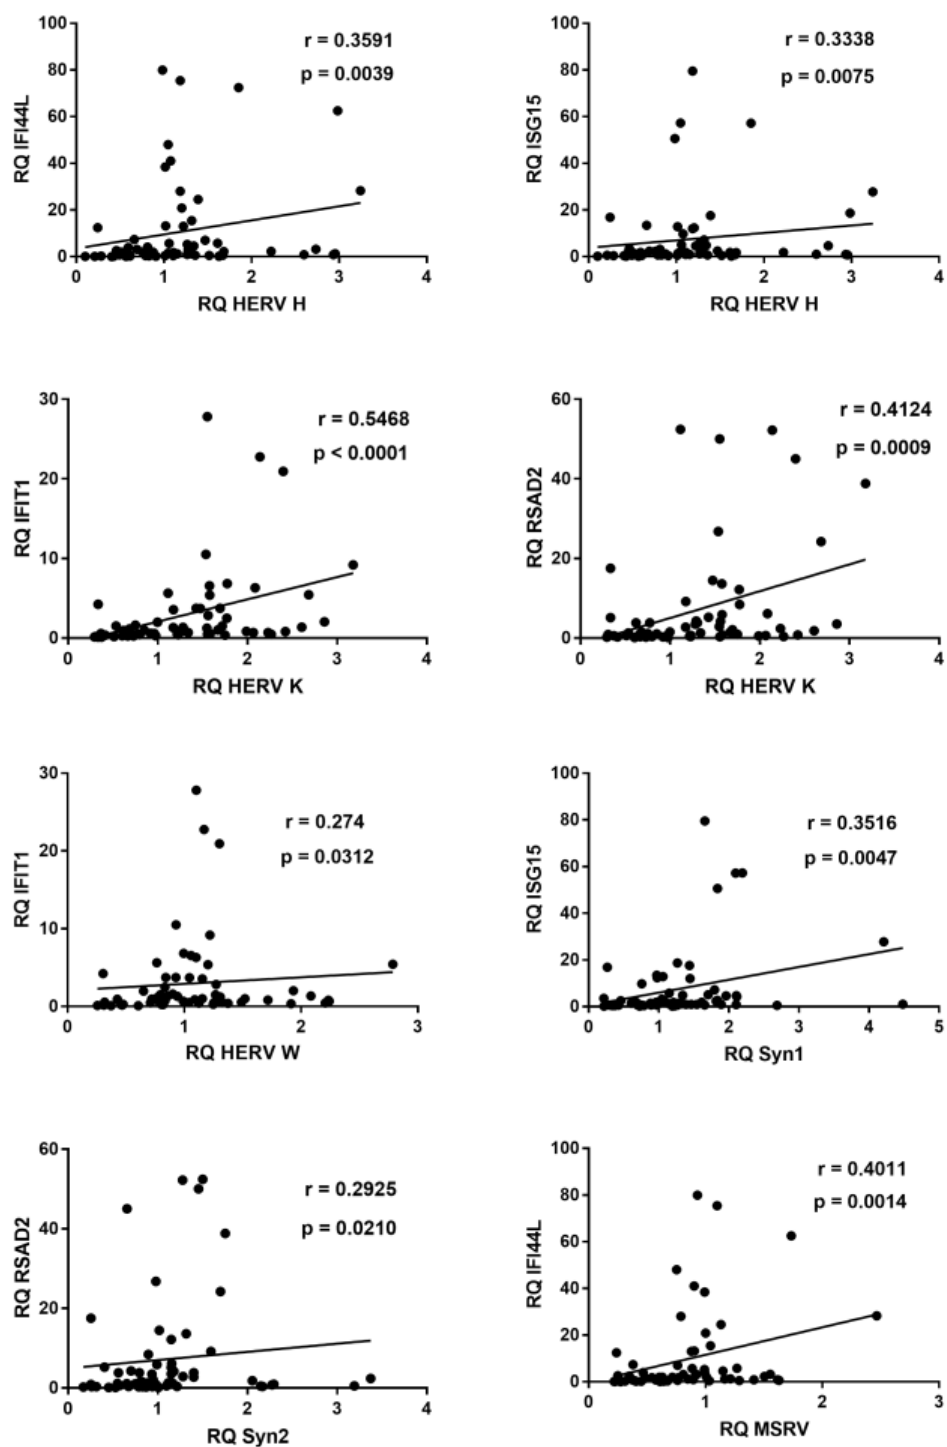

Figure S1

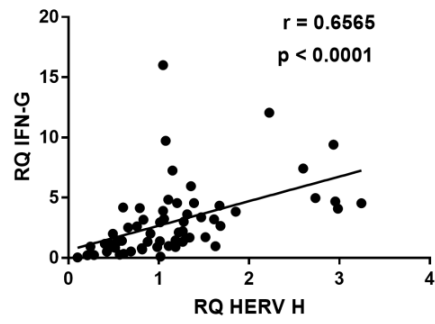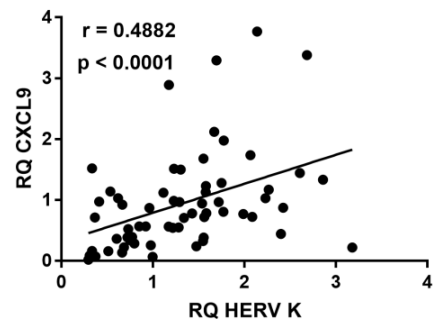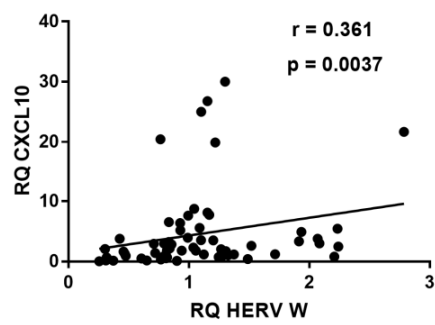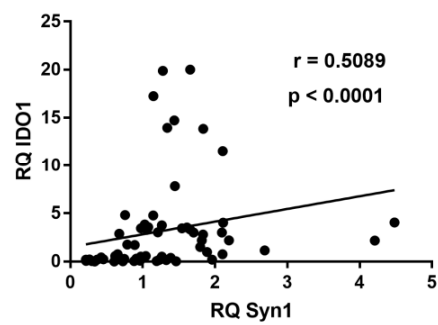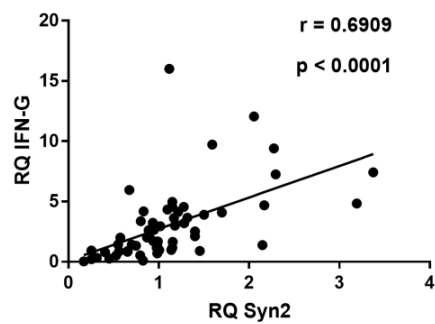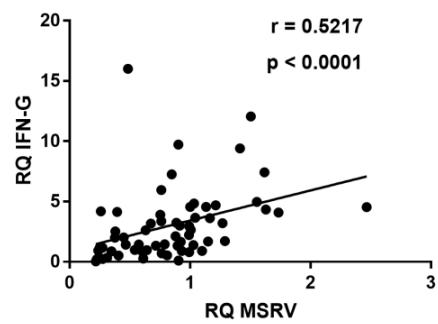

Figure S2

Supplement: s1 [file s1]
